# Supplementary material for: Computational study on thermally activated delayed fluorescence of donor–linker–acceptor network molecules
Source: Royal Society of Chemistry journal article supplement (doi:10.1039/c6ra00053c), 2016-01-01
Supplement: c6ra00053c1.pdf [file c6ra00053c1.pdf]

**Table 1.** Percentage contribution of donor, linker and acceptor groups towards HOMO and LUMO are given.

| Molecules | Orbitals | Donor | Linker | Acceptor |
|-----------|----------|-------|--------|----------|
| 1a        | HOMO     | 89    | 9      | 2        |
|           | LUMO     | 2     | 35     | 63       |
| 1b        | HOMO     | 85    | 12     | 3        |
|           | LUMO     | 2     | 25     | 73       |
| 1c        | HOMO     | 83    | 14     | 3        |
|           | LUMO     | 2     | 17     | 81       |
| 1d        | HOMO     | 87    | 10     | 3        |
|           | LUMO     | 2     | 18     | 80       |
| 1e        | HOMO     | 86    | 11     | 3        |
|           | LUMO     | 3     | 18     | 79       |
| 2a        | HOMO     | 95    | 4      | 1        |
|           | LUMO     | 1     | 4      | 95       |
| 2b        | HOMO     | 95    | 4      | 1        |
|           | LUMO     | 1     | 3      | 96       |
| 2c        | HOMO     | 96    | 3      | 1        |
|           | LUMO     | 0     | 0      | 100      |
| 2d        | HOMO     | 96    | 3      | 1        |
|           | LUMO     | 0     | 0      | 100      |
| 2e        | HOMO     | 96    | 3      | 1        |
|           | LUMO     | 0     | 0      | 100      |

**Table2:** Absorption , fluorescence energies and their corresponding oscillator strengths in gas Phase.

| <b>System</b> | <b>Absorption</b>      |                            | <b>Emission</b>          |                            |
|---------------|------------------------|----------------------------|--------------------------|----------------------------|
|               | <b>Absorption (eV)</b> | <b>Oscillator strength</b> | <b>Fluorescence (eV)</b> | <b>Oscillator strength</b> |
| 1a            | 3.14                   | 0.0942                     | 2.51                     | 0.0005                     |
| 1b            | 2.79                   | 0.1847                     | 2.25                     | 0.0000                     |
| 1c            | 2.47                   | 0.1929                     | 1.94                     | 0.0003                     |
| 1d            | 2.22                   | 0.2023                     | 1.40                     | 0.0007                     |
| 1e            | 2.08                   | 0.2227                     | 1.29                     | 0.0006                     |
| 2a            | 3.58                   | 0.0707                     | 3.14                     | 0.0439                     |
| 2b            | 2.75                   | 0.0453                     | 2.14                     | 0.0144                     |
| 2c            | 2.23                   | 0.0006                     | 1.64                     | 0.0003                     |
| 2d            | 1.91                   | 0.0007                     | 1.11                     | 0.0007                     |
| 2e            | 1.69                   | 0.0005                     | 1.00                     | 0.0002                     |

**Table3.** HOMO, LUMO Energies

| System | In Gas    |           | In Cyclohexane |           | In Methanol |           |
|--------|-----------|-----------|----------------|-----------|-------------|-----------|
|        | HOMO (eV) | LUMO (eV) | HOMO (eV)      | LUMO (eV) | HOMO (eV)   | LUMO (eV) |
| 1a     | -5.92     | 2.28      | -5.93          | -2.25     | -5.96       | -2.20     |
| 1b     | -6.00     | -2.77     | -5.95          | -2.68     | -5.95       | 2.56      |
| 1c     | -5.99     | -3.12     | -5.94          | -3.01     | -5.96       | -2.82     |
| 1d     | -5.65     | -3.07     | -5.61          | -2.99     | -5.64       | -2.82     |
| 1e     | -5.45     | -3.02     | -5.41          | -2.95     | -5.44       | -2.80     |
| 2a     | -5.78     | -1.76     | -5.75          | -1.71     | -5.75       | -1.65     |
| 2b     | -5.76     | -2.55     | -5.75          | -2.42     | -5.79       | -2.22     |
| 2c     | -5.77     | -3.08     | -5.77          | -2.89     | -5.82       | -2.60     |
| 2d     | -5.40     | -3.06     | -5.41          | -2.88     | -5.49       | -2.59     |
| 2e     | -5.16     | -3.04     | -5.18          | -2.86     | -5.29       | -2.59     |

**Table 4. Ionization potentials and electron affinities (Bothe vertical and adiabatic)**

| System | in Gas |        |        |        | in Cyclohexane |        |        |        | in Methanol |        |        |        |
|--------|--------|--------|--------|--------|----------------|--------|--------|--------|-------------|--------|--------|--------|
|        | IP (A) | IP (V) | EA (A) | EA (V) | IP (A)         | IP (V) | EA (A) | EA (V) | IP (A)      | IP (V) | EA (A) | EA (V) |
| 1a     | 7.274  | 7.006  | -0.829 | -1.081 | 6.254          | 6.566  | -1.800 | -1.567 | 5.544       | 5.851  | -2.522 | -2.297 |
| 1b     | 7.333  | 7.201  | -1.343 | -1.593 | 6.425          | 6.562  | -2.259 | -2.015 | 5.687       | 5.829  | -2.891 | -2.657 |
| 1c     | 7.328  | 7.238  | -1.714 | -1.918 | 6.459          | 6.556  | -2.556 | -2.352 | 5.736       | 5.848  | -3.138 | -2.914 |
| 1d     | 6.973  | 6.849  | -1.687 | -1.831 | 6.095          | 6.225  | -2.466 | -2.083 | 5.404       | 5.547  | -3.129 | -2.92  |
| 1e     | 6.708  | 6.580  | -1.657 | -1.738 | 5.871          | 5.990  | -2.372 | -2.316 | 5.236       | 5.341  | -3.117 | -2.907 |
| 2a     | 7.283  | 7.237  | -0.252 | -0.277 | 6.400          | 6.446  | -1.062 | -0.945 | 5.607       | 5.655  | -1.864 | -1.688 |
| 2b     | 7.270  | 7.188  | -0.908 | -1.067 | 6.384          | 6.453  | -1.781 | -1.620 | 5.639       | 5.691  | -2.448 | -2.290 |
| 2c     | 7.273  | 7.191  | -1.450 | -1.626 | 6.406          | 6.469  | -2.268 | -2.100 | 5.628       | 5.731  | -2.827 | -2.664 |
| 2d     | 6.865  | 6.705  | -1.454 | -1.555 | 5.961          | 6.106  | -2.191 | -2.092 | 5.283       | 5.418  | -2.821 | -2.658 |
| 2e     | 6.562  | 6.410  | -1.424 | -1.490 | 5.716          | 5.845  | -2.190 | -2.083 | 5.098       | 5.027  | -2.819 | -2.656 |
